# Supplementary material for: Peripheral Blood Biomarkers Predictive of Efficacy Outcome and Immune-Related Adverse Events in Advanced Gastrointestinal Cancers Treated with Checkpoint Inhibitors
Source: MDPI journal article supplement (doi:10.3390/cancers14153736), 2022-07-31
Supplement: s1 [file s1]

**Table S1.** Immune-related adverse events categorized by different treatment types

| Immune-related adverse events (categories) | Total events (N=260) | Drug target(s) | P value (for total events) | CTCAE Grade 1 (N=170) | CTCAE Grade 2 (N=58) | CTCAE Grade 3-4 (N=32) | P value (for grade 3-4 events) |
|--------------------------------------------|----------------------|----------------|----------------------------|-----------------------|----------------------|------------------------|--------------------------------|
| Skin                                       | 52                   | PD-1           | <b>0.034</b>               | 18                    | 5                    | 2                      | 0.411                          |
|                                            |                      | PD-L1          |                            | 5                     | 2                    | 0                      |                                |
|                                            |                      | PD-1+CTLA-4    |                            | 13                    | 5                    | 2                      |                                |
| Rheumatology                               | 35                   | PD-1           | 0.544                      | 8                     | 5                    | 6                      | 0.356                          |
|                                            |                      | PD-L1          |                            | 4                     | 1                    | 3                      |                                |
|                                            |                      | PD-1+CTLA-4    |                            | 7                     | 0                    | 1                      |                                |
| Pulmonary                                  | 9                    | PD-1           | 0.050                      | 2                     | 2                    | 0                      | NA                             |
|                                            |                      | PD-L1          |                            | 2                     | 1                    | 0                      |                                |
|                                            |                      | PD-1+CTLA-4    |                            | 1                     | 1                    | 0                      |                                |
| Gastrointestinal                           | 21                   | PD-1           | < <b>0.001</b> <           | 2                     | 2                    | 1                      | 0.117                          |
|                                            |                      | PD-L1          |                            | 3                     | 2                    | 0                      |                                |
|                                            |                      | PD-1+CTLA-4    |                            | 6                     | 3                    | 2                      |                                |
| Endocrine                                  | 49                   | PD-1           | < <b>0.001</b>             | 15                    | 2                    | 1                      | 0.435                          |
|                                            |                      | PD-L1          |                            | 4                     | 0                    | 0                      |                                |
|                                            |                      | PD-1+CTLA-4    |                            | 20                    | 6                    | 1                      |                                |
| Hepatology                                 | 59                   | PD-1           | 0.650                      | 25                    | 7                    | 4                      | 0.050                          |
|                                            |                      | PD-L1          |                            | 6                     | 2                    | 3                      |                                |
|                                            |                      | PD-1+CTLA-4    |                            | 8                     | 2                    | 2                      |                                |
| Cardiology                                 | 6                    | PD-1           | 0.246                      | 1                     | 0                    | 1                      | 0.655                          |
|                                            |                      | PD-L1          |                            | 1                     | 0                    | 0                      |                                |
|                                            |                      | PD-1+CTLA-4    |                            | 1                     | 1                    | 1                      |                                |
| Nephrology                                 | 7                    | PD-1           | 0.499                      | 1                     | 1                    | 1                      | 0.655                          |
|                                            |                      | PD-L1          |                            | 0                     | 1                    | 0                      |                                |
|                                            |                      | PD-1+CTLA-4    |                            | 1                     | 1                    | 1                      |                                |
| Others                                     | 22                   | PD-1           | <b>0.013</b>               | 8                     | 2                    | 0                      | NA                             |
|                                            |                      | PD-L1          |                            | 0                     | 1                    | 0                      |                                |
|                                            |                      | PD-1+CTLA-4    |                            | 8                     | 3                    | 0                      |                                |

CTCAE, Common Terminology Criteria for Adverse Event; NA, not applicable. P values were indicated in bold when statistical results were significant.
